# Supplementary material for: Zoonotic Endocarditis in a Man, the Netherlands
Source: PubMed Central journal article supplement (PMC6302571; doi:10.3201/eid2501.181029), 2019-01
Supplement: 18-1029-Techapp-s1.pdf [file 18-1029-Techapp-s1.pdf]

# Zoonotic Endocarditis in a Man, the Netherlands

## Appendix

### Supplementary Methods

DNA was isolated using the MO-BIO Ultra Clean Microbial DNA isolation kit (MO-BIO Laboratories INC, Carlsbad, CA). Sequencing was performed using Illumina NextSeq with 150 bp paired end reads, that were assembled using SPAdes 3.10.1 (1). The average coverage was 90x. The quality of genomes obtained in this study and the downloaded genomes was assessed with CheckM (2). Only genomes with >98% completeness score were included. The whole genome sequence data of the isolates have been deposited at the Short Read Archive under project PRJEB27317 with the accession numbers listed in the Appendix Table. A core-genome alignment using Parsnp v1.2 (3) on contigs larger than 2 kbp was performed to construct phylogenetic maximum likelihood trees using FastTree2 (4) and visualized with FigTree (<http://tree.bio.ed.ac.uk/software/figtree/>). Genomes were annotated with Prokka (5) and orthology was determined using Roary (6).

### References

1. Bankevich A, Nurk S, Antipov D, Gurevich AA, Dvorkin M, Kulikov AS, et al. SPAdes: a new genome assembly algorithm and its applications to single-cell sequencing. *J Comput Biol.* 2012;19:455–77. [PubMed http://dx.doi.org/10.1089/cmb.2012.0021](http://dx.doi.org/10.1089/cmb.2012.0021)
2. Parks DH, Imelfort M, Skennerton CT, Hugenholtz P, Tyson GW. CheckM: assessing the quality of microbial genomes recovered from isolates, single cells, and metagenomes. *Genome Res.* 2015;25:1043–55. [PubMed http://dx.doi.org/10.1101/gr.186072.114](http://dx.doi.org/10.1101/gr.186072.114)
3. Treangen TJ, Ondov BD, Koren S, Phillippy AM. The Harvest suite for rapid core-genome alignment and visualization of thousands of intraspecific microbial genomes. *Genome Biol.* 2014;15:524. [PubMed http://dx.doi.org/10.1186/s13059-014-0524-x](http://dx.doi.org/10.1186/s13059-014-0524-x)

4. Price MN, Dehal PS, Arkin AP. FastTree 2 – Approximately Maximum-Likelihood Trees for Large Alignments. Poon AFY, editor. PLoS One. 2010 Mar 10;5(3):e9490.
5. Seemann T. Prokka: rapid prokaryotic genome annotation. Bioinformatics. 2014;30:2068–9. [PubMed](https://pubmed.ncbi.nlm.nih.gov/24550623/)  
<http://dx.doi.org/10.1093/bioinformatics/btu153>
6. Page AJ, Cummins CA, Hunt M, Wong VK, Reuter S, Holden MTG, et al. Roary: rapid large-scale prokaryote pan genome analysis. Bioinformatics. 2015;31:3691–3. [PubMed](https://pubmed.ncbi.nlm.nih.gov/25712258/)  
<http://dx.doi.org/10.1093/bioinformatics/btv421>

**Appendix Table.** *Strep. Equi* subsp. *Zooepidemicus* strains investigated by whole genome sequencing

| Strain     | Source  | MLST |          | Accession      | Reference | Assembly                   |
|------------|---------|------|----------|----------------|-----------|----------------------------|
|            |         | type | Coverage |                |           |                            |
| 17S02337–1 | human   | 212  | 85       | ERS2550930     |           |                            |
| 17S02338–1 | horse D | 92   | 83       | ERS2550931     |           |                            |
| 17S02339–1 | horse A | 99   | 100      | ERS2550932     |           |                            |
| 17S02340–1 | horse A | 212  | 95       | ERS2550933     |           |                            |
| 17S02341–1 | horse B | 212  | 99       | ERS2550934     |           |                            |
| 17S02342–1 | horse B | 212  | 92       | ERS2550935     |           |                            |
| 17S02343–1 | horse B | 212  | 85       | ERS2550936     |           |                            |
| 17S02344–1 | horse B | 212  | 68       | ERS2550937     |           |                            |
| 17S02345–1 | horse C | 212  | 69       | ERS2550938     |           |                            |
| 17S02346–1 | horse C | 212  | 95       | ERS2550939     |           |                            |
| MGCS10565  |         | 72   |          | CP001129.1     | ref       | GCA_000020765.1_ASM2076v1  |
| H70        |         | 1    |          | FM204884.1     | ref       | GCA_000026605.1_ASM2660v1  |
| BHS5       |         | 123  |          | CABY01000011.1 | ref       | GCA_000208725.1_ASM20872v1 |
| ATCC35246  |         | 194  |          | CP002904.1     | ref       | GCA_000219765.1_ASM21976v1 |
| SzS31A1    |         | 279  |          | AUXA02000089.1 | ref       | GCA_000445225.2_ASM44522v2 |
| CY         |         | 194  |          | CP006770.1     | ref       | GCA_000696505.1_ASM69650v1 |
| 2329       |         | -    |          | JTJH01000001.1 | ref       | GCA_000836615.1_ASM83661v1 |
| Sz105      |         | 140  |          | JATZ01000041.1 | ref       | GCA_000876195.1_ASM87619v1 |
| Sz4is      |         | 279  |          | JAUE01000033.1 | ref       | GCA_000876215.1_ASM87621v1 |
| SzAM35     |         | 65   |          | JATY01000119.1 | ref       | GCA_000876275.1_ASM87627v1 |
| SzAM60     |         | -    |          | JATX01000052.1 | ref       | GCA_000876285.1_ASM87628v1 |
| Sz16       |         | 156  |          | JATW01000074.1 | ref       | GCA_000876295.1_ASM87629v1 |
| Sz12is     |         | 279  |          | JAUD01000037.1 | ref       | GCA_000876305.1_ASM87630v1 |
| Sz5        |         | 303  |          | JAUC01000036.1 | ref       | GCA_000876355.1_ASM87635v1 |
| Sz35       |         | 203  |          | JAUB01000112.1 | ref       | GCA_000876365.1_ASM87636v1 |
| Sz57       |         | 96   |          | JAUA01000048.1 | ref       | GCA_000876375.1_ASM87637v1 |

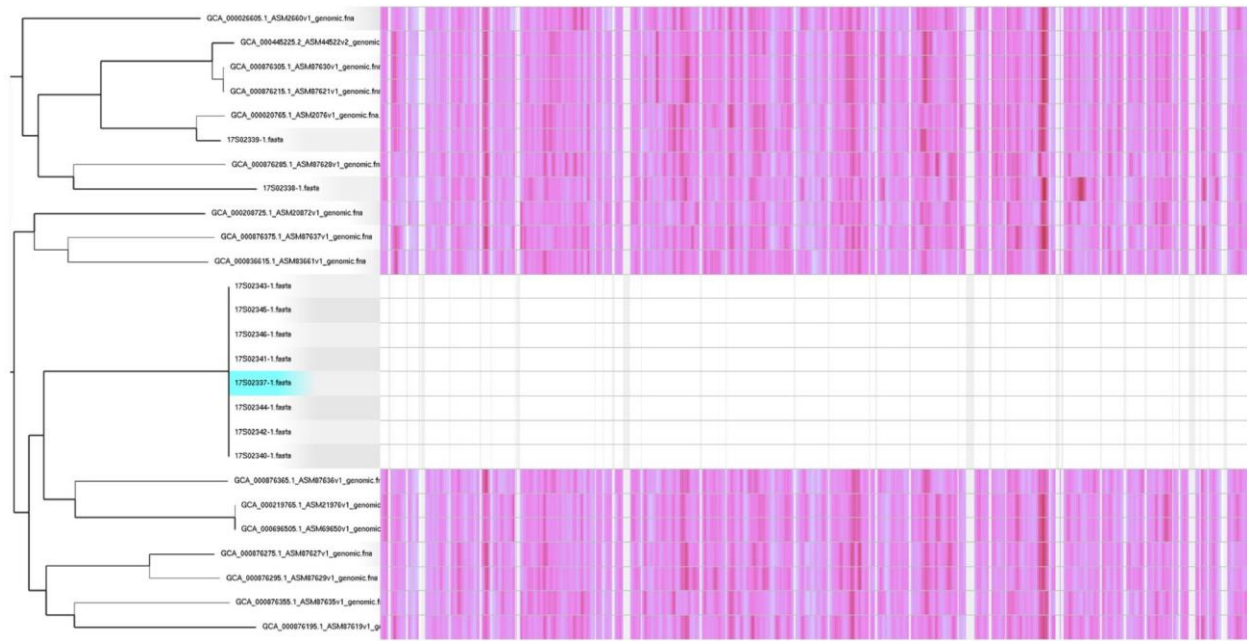

**Appendix Figure.** Phylogenetic tree and single-nucleotide polymorphism locations of whole-genome alignment data of human, horse, and reference isolates. Blue shading, human isolate; purple, single-nucleotide polymorphisms; gray, DNA regions that were excluded from the analysis.
